# Supplementary material
Source: PubMed Central journal article supplement (PMC4757942)
Supplement: supp_kwv125_kwv125supp.pdf [file supp_kwv125_kwv125supp.pdf]

# Vaccination and All Cause Child Mortality 1985-2011: Global Evidence from the Demographic and Health Surveys

Mark E. McGovern\*<sup>†</sup>

David Canning<sup>‡</sup>

## Web Appendix

---

\*Corresponding author. Address: 9 Bow Street, Cambridge, MA 02138, USA.

<sup>†</sup>Harvard Center for Population and Development Studies and Department of Global Health and Population, Harvard T.H. Chan School of Public Health. Email: [mcgovern@hsph.harvard.edu](mailto:mcgovern@hsph.harvard.edu).

<sup>‡</sup>Harvard Center for Population and Development Studies and Department of Global Health and Population, Harvard T.H. Chan School of Public Health. Email: [dcanning@hsph.harvard.edu](mailto:dcanning@hsph.harvard.edu).

**Web Table 1:** Demographic and Health Surveys Included in the Analysis

---

| DHS Survey: Year             | DHS Survey: Year                         |
|------------------------------|------------------------------------------|
| Albania Year: 2008-2009      | Central African Republic Year: 1994-1995 |
| Bangladesh Year: 1993-1994   | Chad Year: 1996-1997                     |
| Bangladesh Year: 1996-1997   | Chad Year: 2004                          |
| Bangladesh Year: 1999-2000   | Colombia Year: 1990                      |
| Bangladesh Year: 2004        | Colombia Year: 1995                      |
| Bangladesh Year: 2007        | Colombia Year: 2000                      |
| Benin Year: 1996             | Colombia Year: 2005                      |
| Benin Year: 2001             | Colombia Year: 2010                      |
| Benin Year: 2006             | Comoros Year: 1996                       |
| Bolivia Year: 1994           | Congo Democratic Republic Year: 2007     |
| Bolivia Year: 1998           | Congo (Brazzaville) Year: 2005           |
| Bolivia Year: 2003           | Cote d'Ivoire Year: 1994                 |
| Bolivia Year: 2008           | Cote d'Ivoire Year: 1998-1999            |
| Brazil Year: 1996            | Dominican Republic Year: 1996            |
| Burkina Faso Year: 1993      | Dominican Republic Year: 1999            |
| Burkina Faso Year: 1998-1999 | Dominican Republic Year: 2002            |
| Burkina Faso Year: 2003      | Dominican Republic Year: 2007            |
| Burkina Faso Year: 2010      | Egypt Year: 1995                         |
| Burundi Year: 2010           | Egypt Year: 2000                         |
| Cambodia Year: 2000          | Egypt Year: 2005                         |
| Cambodia Year: 2005          | Egypt Year: 2008                         |
| Cambodia Year: 2010          | Ethiopia Year: 2000                      |
| Cameroon Year: 1991          | Ethiopia Year: 2005                      |
| Cameroon Year: 1998          | Ethiopia Year: 2011                      |
| Cameroon Year: 2004          | Gabon Year: 2000                         |
| Cameroon Year: 2011          | Ghana Year: 1993                         |
| Ghana Year: 1998             | Lesotho Year: 2009                       |
| Ghana Year: 2003             | Liberia Year: 2007                       |
| Ghana Year: 2008             | Madagascar Year: 1997                    |
| Guatemala Year: 1995         | Madagascar Year: 2003-2004               |
| Guinea Year: 1999            | Madagascar Year: 2008-2009               |
| Guinea Year: 2005            | Malawi Year: 1992                        |
| Guyana Year: 2009            | Malawi Year: 2000                        |
| Haiti Year: 1994             | Malawi Year: 2004                        |
| Haiti Year: 2000             | Malawi Year: 2010                        |
| Haiti Year: 2005-2006        | Maldives Year: 2009                      |
| Honduras Year: 2005-2006     | Mali Year: 2001                          |
| India Year: 1992-1993        | Mali Year: 2006                          |
| India Year: 1998-1999        | Moldova Year: 2005                       |

**Table 1 – Continued on the Next Page**

| DHS Survey: Year                      | DHS Survey: Year            |
|---------------------------------------|-----------------------------|
| India Year: 2005-2006                 | Morocco Year: 1992          |
| Indonesia Year: 1997                  | Morocco Year: 2003-2004     |
| Indonesia Year: 2002-2003             | Mozambique Year: 1997       |
| Indonesia Year: 2007                  | Mozambique Year: 2003       |
| Jordan Year: 1990                     | Namibia Year: 1992          |
| Jordan Year: 1997                     | Namibia Year: 2006-2007     |
| Jordan Year: 2002                     | Nepal Year: 1996            |
| Jordan Year: 2007                     | Nepal Year: 2001            |
| Kenya Year: 1993                      | Nepal Year: 2006            |
| Kenya Year: 1998                      | Nepal Year: 2011            |
| Kenya Year: 2003                      | Nicaragua Year: 1998        |
| Kenya Year: 2008-2009                 | Nicaragua Year: 2001        |
| Lesotho Year: 2004                    | Niger Year: 1998            |
| Niger Year: 2006                      | Tanzania Year: 2004-2005    |
| Nigeria Year: 1990                    | Tanzania Year: 2010         |
| Nigeria Year: 2003                    | Timor Leste Year: 2009-2010 |
| Nigeria Year: 2008                    | Togo Year: 1998             |
| Pakistan Year: 1990                   | Turkey Year: 1993           |
| Pakistan Year: 2006-2007              | Turkey Year: 1998           |
| Paraguay Year: 1990                   | Uganda Year: 1995           |
| Peru Year: 1991-1992                  | Uganda Year: 2000-2001      |
| Peru Year: 1996                       | Uganda Year: 2006           |
| Peru Year: 2000                       | Uganda Year: 2011           |
| Philippines Year: 1993                | Vietnam Year: 1997          |
| Philippines Year: 1998                | Vietnam Year: 2002          |
| Philippines Year: 2003                | Zambia Year: 1996           |
| Philippines Year: 2008                | Zambia Year: 2001-2002      |
| Rwanda Year: 1992                     | Zambia Year: 2007           |
| Rwanda Year: 2000                     | Zimbabwe Year: 1994         |
| Rwanda Year: 2005                     | Zimbabwe Year: 1999         |
| Rwanda Year: 2010                     | Zimbabwe Year: 2005-2006    |
| Sao Tome and Principe Year: 2008-2009 | Zimbabwe Year: 2010-2011    |
| Senegal Year: 2005                    |                             |
| Senegal Year: 2010-2011               |                             |
| Sierra Leone Year: 2008               |                             |
| South Africa Year: 1998               |                             |
| Swaziland Year: 2006-2007             |                             |
| Tanzania Year: 1996                   |                             |
| Tanzania Year: 1999                   |                             |

Note: Demographic and Health Survey data are available from [www.dhsprogram.com](http://www.dhsprogram.com).

## Web Appendix 1

We excluded data from the first round of the Demographic and Health Surveys (DHS), as in the first wave vaccination status was typically recorded from vaccination cards alone, resulting in a high proportion of missing values, whereas later surveys include the mother’s report of their children’s vaccination status. Overall, 13% of children in the sample are reported as not having a card, while a further 30% do not have their card presented to the interviewer. If the vaccination card is not available, mothers are asked to report vaccination status. Langsten and Hill show that maternal reporting of Bacille Calmette-Guérin (BCG) status in Egypt is 98% accurate, compared to 83% for DPT3 (1). More recently, Murray and colleagues do not find any evidence that maternal recall bias affects coverage estimates in the DHS (2). However, the mother-reported information is an important limitation of the data (3).

World Health Organization (WHO) recommendations for vaccination have changed over time, in part reflecting updated evidence on the effectiveness of vaccines, and changing priorities from variation in coverage rates. For example, initially the Expanded Program on Immunization (EPI) recommended one dose of measles containing vaccine (MCV1), however two doses are now standard in many countries as vaccination failure typically occurs in 10-15% of infants receiving the first dose at 9 months (4). Failure rates are likely to be even higher if immunization occurs before 9 months due to immaturity of the immune system. The WHO recommends prioritizing the first measles dose until 80% coverage of MCV1 for three consecutive years has been achieved (4). Regarding Polio, in high risk countries an Oral Polio Vaccine (OPV) birth dose (Polio 0) followed by a primary series of three OPV doses and at least one Inactivated Poliovirus Vaccine (IPV) dose is now recommended (5). As relatively few DHS surveys include information on Polio 0 or a second measles containing vaccination (MCV2), we are restricted to the five types (BCG, DPT 1-3, Polio 1-3, MCV1, and maternal tetanus) if we wish to use all available datasets. Our data does not distinguish between a monovalent measles vaccine and the combined measles, mumps, and rubella (MMR) vaccine, or between IPV and OPV.

**Web Table 2:** Corrected Cluster Vaccination Coverage Rates

| Cluster Vaccination Coverage | Median | Mean   | SD     | N      |
|------------------------------|--------|--------|--------|--------|
| Measles                      |        |        |        |        |
| Base                         | 88.89% | 79.77% | 25.65% | 68,490 |
| Iteration 1                  | 88.83% | 79.64% | 25.75% | 68,490 |
| Iteration 2                  | 88.83% | 79.64% | 25.75% | 68,490 |
| Iteration 3                  | 88.83% | 79.64% | 25.75% | 68,490 |
| Iteration 4                  | 88.83% | 79.64% | 25.75% | 68,490 |
| Iteration 5                  | 88.83% | 79.64% | 25.75% | 68,490 |
| Iteration 6                  | 88.83% | 79.64% | 25.75% | 68,490 |
| Iteration 7                  | 88.83% | 79.64% | 25.75% | 68,490 |
| Iteration 8                  | 88.83% | 79.64% | 25.75% | 68,490 |
| Iteration 9                  | 88.83% | 79.64% | 25.75% | 68,490 |
| Iteration 10                 | 88.83% | 79.64% | 25.75% | 68,490 |
| DPT Polio                    |        |        |        |        |
| Base                         | 88.89% | 81.92% | 21.22% | 68,490 |
| Iteration 1                  | 88.89% | 81.91% | 21.23% | 68,490 |
| Iteration 2                  | 88.89% | 81.91% | 21.23% | 68,490 |
| Iteration 3                  | 88.89% | 81.91% | 21.23% | 68,490 |
| Iteration 4                  | 88.89% | 81.91% | 21.23% | 68,490 |
| Iteration 5                  | 88.89% | 81.91% | 21.23% | 68,490 |
| Iteration 6                  | 88.89% | 81.91% | 21.23% | 68,490 |
| Iteration 7                  | 88.89% | 81.91% | 21.23% | 68,490 |
| Iteration 8                  | 88.89% | 81.91% | 21.23% | 68,490 |
| Iteration 9                  | 88.89% | 81.91% | 21.23% | 68,490 |
| Iteration 10                 | 88.89% | 81.91% | 21.23% | 68,490 |

Table 2 – Continued on the Next Page

| Cluster Vaccination Coverage | Median  | Mean   | SD     | N      |
|------------------------------|---------|--------|--------|--------|
| BCG                          |         |        |        |        |
| Base                         | 100.00% | 87.28% | 22.22% | 68,490 |
| Iteration 1                  | 100.00% | 87.30% | 22.20% | 68,490 |
| Iteration 2                  | 100.00% | 87.29% | 22.21% | 68,490 |
| Iteration 3                  | 100.00% | 87.29% | 22.21% | 68,490 |
| Iteration 4                  | 100.00% | 87.29% | 22.21% | 68,490 |
| Iteration 5                  | 100.00% | 87.29% | 22.21% | 68,490 |
| Iteration 6                  | 100.00% | 87.29% | 22.21% | 68,490 |
| Iteration 7                  | 100.00% | 87.29% | 22.21% | 68,490 |
| Iteration 8                  | 100.00% | 87.29% | 22.21% | 68,490 |
| Iteration 9                  | 100.00% | 87.29% | 22.21% | 68,490 |
| Iteration 10                 | 100.00% | 87.29% | 22.21% | 68,490 |

| Mean Vaccination |        |        |        |        |
|------------------|--------|--------|--------|--------|
| Base             | 81.30% | 76.80% | 19.34% | 68,490 |
| Iteration 1      | 81.25% | 76.64% | 19.45% | 68,490 |
| Iteration 2      | 81.25% | 76.62% | 19.46% | 68,490 |
| Iteration 3      | 81.25% | 76.61% | 19.46% | 68,490 |
| Iteration 4      | 81.25% | 76.61% | 19.46% | 68,490 |
| Iteration 5      | 81.25% | 76.61% | 19.46% | 68,490 |
| Iteration 6      | 81.25% | 76.61% | 19.46% | 68,490 |
| Iteration 7      | 81.25% | 76.61% | 19.46% | 68,490 |
| Iteration 8      | 81.25% | 76.61% | 19.46% | 68,490 |
| Iteration 9      | 81.25% | 76.61% | 19.46% | 68,490 |
| Iteration 10     | 81.25% | 76.61% | 19.46% | 68,490 |

The base vaccination coverage rate is the raw cluster vaccination rate in the data which excludes children who have died. The vaccination coverage rate in iterations 1-10 corrects for this missing data using the procedure described in the main text.

**Web Figure 1: Histogram of Mean Vaccination Coverage**

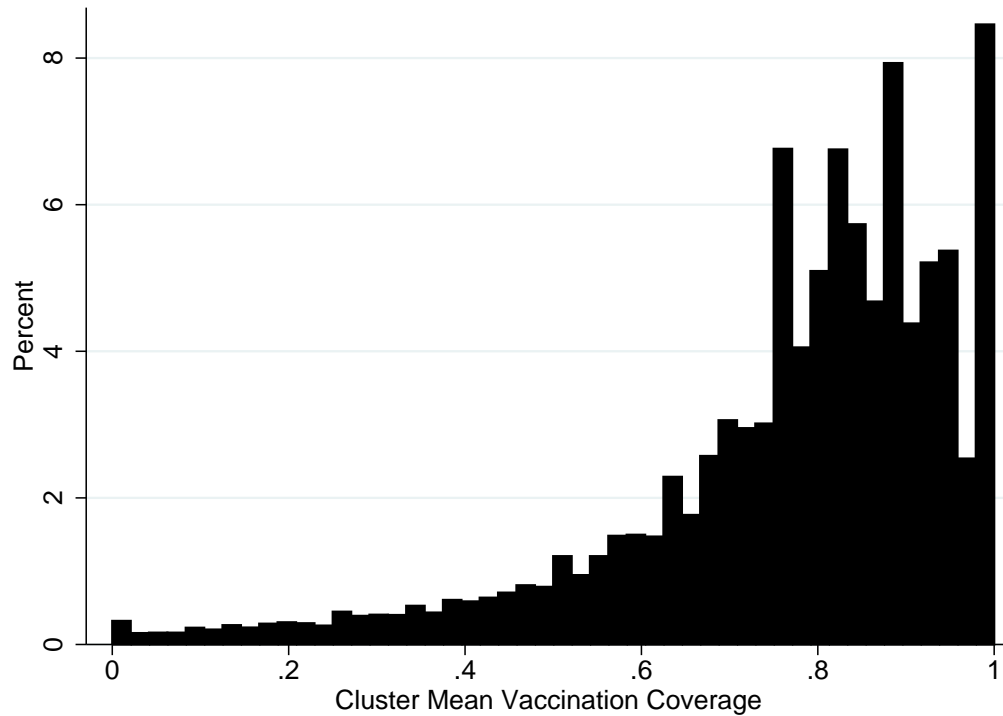

Source: Demographic and Health Surveys. For BCG, measles, and maternal tetanus, we construct a binary indicator variable for each child indicating whether they received the relevant vaccine dose. We combine DPT and Polio into a single variable where each dose counts for 1/6. Therefore, receiving a full schedule of DPT and Polio results in a score of 1. Mean vaccination coverage is defined as the average of the BCG, DPT/Polio, measles, and maternal tetanus vaccination rates in the cluster. The data include 68,490 DHS primary sampling unit clusters, based on 149 surveys in 62 countries, and 960,271 children born between 1985 and 2011.

**Web Figure 2:** Scatterplot of Raw Mean Vaccination Coverage and Mortality-Corrected Mean Vaccination Coverage

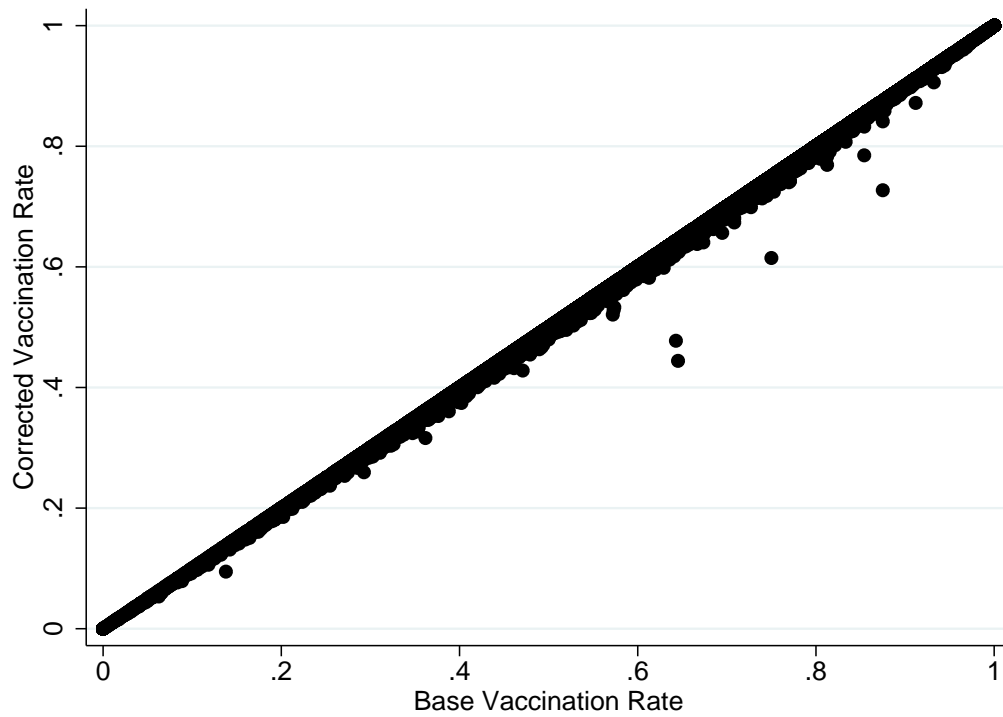

Source: Demographic and Health Surveys. The data include 68,490 DHS primary sampling unit clusters, based on 149 surveys in 62 countries, and 960,271 children born between 1985 and 2011. The corrected vaccination rate adjusts for missing immunization information on children who have died using the procedure described in the main text.



**Web Table 3:** Poisson Model Results for Cluster Vaccination Coverage and Cluster Under Five Mortality in the Demographic and Health Surveys 1985-2011 (Unadjusted for Covariates other than Country Fixed Effects and Time Trends)

| Variables                                       | Relative Risk<br>Cluster Level<br>Under 5 Mortality<br>(95% CI) |
|-------------------------------------------------|-----------------------------------------------------------------|-----------------------------------------------------------------|-----------------------------------------------------------------|-----------------------------------------------------------------|
| Cluster Vaccination Average Coverage            | 0.38 (0.36 - 0.40)                                              | 0.37 (0.35 - 0.38)                                              |                                                                 |                                                                 |
| Cluster BCG Coverage                            |                                                                 |                                                                 | 1.06 (0.98 - 1.14)                                              | 1.06 (0.98 - 1.15)                                              |
| Cluster DPT Polio Coverage                      |                                                                 |                                                                 | 0.85 (0.77 - 0.93)                                              | 0.86 (0.79 - 0.94)                                              |
| Cluster Measles Coverage                        |                                                                 |                                                                 | 0.71 (0.66 - 0.77)                                              | 0.70 (0.65 - 0.75)                                              |
| Cluster Maternal Tetanus Coverage               |                                                                 |                                                                 | 0.57 (0.53 - 0.58)                                              | 0.56 (0.53 - 0.58)                                              |
| Corrected for Missing Data on Children who Died | No                                                              | Yes                                                             | No                                                              | Yes                                                             |
| Country Fixed Effects and Country Time Trends   | Yes                                                             | Yes                                                             | Yes                                                             | Yes                                                             |
| Full Set of Control Variables                   | No                                                              | No                                                              | No                                                              | No                                                              |
| Observations                                    | 68,490                                                          | 68,490                                                          | 68,490                                                          | 68,490                                                          |

Note: Demographic and Health Survey data are available from [www.dhsprogram.com](http://www.dhsprogram.com). All variables are averages at the level of the DHS primary sampling unit cluster, based on 149 surveys in 62 countries, and 960,271 children born between 1985 and 2011. Coefficients illustrate the relative risk of moving from 0% vaccination coverage to 100% coverage (on the mortality of children born in the 5 years prior to interview). Columns 1 and 3 are based on the raw vaccination coverage in a cluster (defined as the proportion of children one year or older who have received the relevant doses), while columns 2 and 4 adjust the vaccination data for the selection effect due to non-reporting of vaccination status of children who have died. Models control for country fixed effects and country time trends.

**Web Table 4: Poisson Model Results for Cluster Vaccination Coverage and Cluster Under Five Mortality in the Demographic and Health Surveys 1985-2011 (Full Results Showing All Covariates)**

| Variables                                       | Relative Risk                                  | Relative Risk                                  | Relative Risk                                  | Relative Risk                                  |
|-------------------------------------------------|------------------------------------------------|------------------------------------------------|------------------------------------------------|------------------------------------------------|
|                                                 | Cluster Level<br>Under 5 Mortality<br>(95% CI) |
| Cluster Vaccination Average Coverage            | 0.76 (0.71 - 0.81)                             | 0.73 (0.68 - 0.77)                             |                                                |                                                |
| Cluster BCG Coverage                            |                                                |                                                | 1.04 (0.96 - 1.12)                             | 1.03 (0.96 - 1.11)                             |
| Cluster DPT Polio Coverage                      |                                                |                                                | 0.97 (0.89 - 1.06)                             | 0.97 (0.89 - 1.06)                             |
| Cluster Measles Coverage                        |                                                |                                                | 0.83 (0.77 - 0.89)                             | 0.83 (0.78 - 0.89)                             |
| Cluster Maternal Tetanus Coverage               |                                                |                                                | 0.92 (0.86 - 0.97)                             | 0.92 (0.86 - 0.97)                             |
| <b>Wealth Index: Omitted=Highest</b>            |                                                |                                                |                                                |                                                |
| Cluster Mean Lowest Quintile                    | 1.12 (1.05 - 1.19)                             | 1.11 (1.04 - 1.19)                             | 1.12 (1.05 - 1.19)                             | 1.12 (1.05 - 1.19)                             |
| Cluster Mean Second Quintile                    | 1.12 (1.06 - 1.20)                             | 1.12 (1.05 - 1.19)                             | 1.12 (1.06 - 1.20)                             | 1.12 (1.06 - 1.20)                             |
| Cluster Mean Third Quintile                     | 1.06 (1.00 - 1.13)                             | 1.06 (1.00 - 1.12)                             | 1.06 (1.00 - 1.13)                             | 1.06 (1.00 - 1.13)                             |
| Cluster Mean Fourth Quintile                    | 1.08 (1.02 - 1.15)                             | 1.08 (1.02 - 1.14)                             | 1.08 (1.02 - 1.14)                             | 1.08 (1.02 - 1.14)                             |
| Cluster Mean Year of Birth                      | 0.14 (0.13 - 0.16)                             | 0.14 (0.13 - 0.16)                             | 0.14 (0.13 - 0.16)                             | 0.14 (0.13 - 0.16)                             |
| Cluster Mean Sex of Child – Female              | 0.93 (0.90 - 0.95)                             | 0.93 (0.90 - 0.95)                             | 0.92 (0.90 - 0.95)                             | 0.92 (0.90 - 0.95)                             |
| Cluster Mean Was not Multiple Birth             | 0.90 (0.85 - 0.96)                             | 0.90 (0.85 - 0.96)                             | 0.90 (0.85 - 0.96)                             | 0.90 (0.85 - 0.96)                             |
| <b>Place of Birth: Omitted= Own Home</b>        |                                                |                                                |                                                |                                                |
| Cluster Mean Other Home                         | 1.01 (0.93 - 1.11)                             | 1.01 (0.93 - 1.11)                             | 1.01 (0.92 - 1.11)                             | 1.01 (0.92 - 1.11)                             |
| Cluster Mean Government Hospital                | 0.82 (0.78 - 0.87)                             | 0.83 (0.78 - 0.87)                             | 0.83 (0.78 - 0.88)                             | 0.83 (0.78 - 0.88)                             |
| Cluster Mean Government Health Center           | 0.87 (0.82 - 0.91)                             | 0.87 (0.83 - 0.92)                             | 0.87 (0.82 - 0.92)                             | 0.87 (0.82 - 0.92)                             |
| Cluster Mean Private Hospital or Clinic         | 0.80 (0.75 - 0.86)                             | 0.80 (0.75 - 0.86)                             | 0.80 (0.74 - 0.86)                             | 0.80 (0.74 - 0.86)                             |
| Cluster Mean Other and Unknown                  | 1.97 (1.68 - 2.31)                             | 1.96 (1.67 - 2.30)                             | 1.99 (1.69 - 2.33)                             | 1.98 (1.69 - 2.32)                             |
| <b>Birth Interval: Omitted=12-17 Months</b>     |                                                |                                                |                                                |                                                |
| Cluster Mean Birth Interval First Birth         | 0.14 (0.12 - 0.17)                             | 0.14 (0.12 - 0.17)                             | 0.14 (0.12 - 0.17)                             | 0.14 (0.12 - 0.17)                             |
| Cluster Mean Birth Interval 1-11                | 5.15 (3.79 - 7.00)                             | 5.09 (3.75 - 6.92)                             | 5.15 (3.79 - 7.00)                             | 5.15 (3.79 - 7.00)                             |
| Cluster Mean Birth Interval 18-23               | 0.22 (0.19 - 0.26)                             | 0.22 (0.19 - 0.26)                             | 0.22 (0.19 - 0.26)                             | 0.22 (0.19 - 0.26)                             |
| Cluster Mean Birth Interval 24+                 | 0.12 (0.11 - 0.14)                             | 0.12 (0.11 - 0.14)                             | 0.12 (0.11 - 0.14)                             | 0.12 (0.11 - 0.14)                             |
| Cluster Mean Number of Siblings                 | 1.07 (1.06 - 1.09)                             | 1.07 (1.05 - 1.09)                             | 1.07 (1.05 - 1.09)                             | 1.07 (1.05 - 1.09)                             |
| <b>Mother's Age: Omitted=15-19</b>              |                                                |                                                |                                                |                                                |
| Cluster Mean Mother's Age 20-24                 | 0.77 (0.68 - 0.86)                             | 0.77 (0.68 - 0.86)                             | 0.77 (0.69 - 0.87)                             | 0.77 (0.69 - 0.87)                             |
| Cluster Mean Mother's Age 25-29                 | 0.63 (0.56 - 0.71)                             | 0.63 (0.56 - 0.72)                             | 0.64 (0.56 - 0.72)                             | 0.63 (0.56 - 0.72)                             |
| Cluster Mean Mother's Age 30-34                 | 0.59 (0.52 - 0.67)                             | 0.59 (0.52 - 0.67)                             | 0.59 (0.52 - 0.68)                             | 0.59 (0.52 - 0.68)                             |
| Cluster Mean Mother's Age 35-39                 | 0.59 (0.51 - 0.68)                             | 0.59 (0.51 - 0.68)                             | 0.59 (0.51 - 0.68)                             | 0.59 (0.51 - 0.68)                             |
| Cluster Mean Mother's Age 40-44                 | 0.61 (0.52 - 0.72)                             | 0.61 (0.52 - 0.73)                             | 0.62 (0.52 - 0.73)                             | 0.62 (0.52 - 0.73)                             |
| Cluster Mean Mother's Age 45-49                 | 0.70 (0.55 - 0.89)                             | 0.70 (0.55 - 0.89)                             | 0.70 (0.55 - 0.89)                             | 0.70 (0.55 - 0.89)                             |
| Cluster Mean Rural Place of Residence           | 0.95 (0.93 - 0.98)                             | 0.95 (0.93 - 0.98)                             | 0.95 (0.93 - 0.98)                             | 0.95 (0.93 - 0.98)                             |
| <b>Mother's Highest Education: Omitted=None</b> |                                                |                                                |                                                |                                                |
| Cluster Mean Primary                            | 0.97 (0.92 - 1.03)                             | 0.97 (0.92 - 1.03)                             | 0.97 (0.92 - 1.03)                             | 0.97 (0.92 - 1.03)                             |
| Cluster Mean Secondary                          | 0.84 (0.78 - 0.90)                             | 0.84 (0.78 - 0.90)                             | 0.84 (0.78 - 0.90)                             | 0.84 (0.78 - 0.90)                             |
| Cluster Mean Higher Education                   | 0.71 (0.60 - 0.82)                             | 0.71 (0.61 - 0.82)                             | 0.71 (0.60 - 0.82)                             | 0.71 (0.60 - 0.82)                             |

**Table 4 – Continued on the Next Page**

| Variables                                       | Relative Risk      | Relative Risk      | Relative Risk      | Relative Risk      |
|-------------------------------------------------|--------------------|--------------------|--------------------|--------------------|
|                                                 | Cluster Level      | Cluster Level      | Cluster Level      | Cluster Level      |
|                                                 | Under 5 Mortality  | Under 5 Mortality  | Under 5 Mortality  | Under 5 Mortality  |
|                                                 | (95% CI)           | (95% CI)           | (95% CI)           | (95% CI)           |
| Cluster Mean Missing                            | 0.49 (0.11 - 2.06) | 0.48 (0.11 - 2.05) | 0.48 (0.11 - 2.05) | 0.49 (0.11 - 2.06) |
| Cluster Mean Flush Toilet Access                | 0.90 (0.86 - 0.95) | 0.90 (0.86 - 0.95) | 0.90 (0.86 - 0.95) | 0.90 (0.86 - 0.95) |
| Cluster Mean Piped Water in House               | 0.98 (0.95 - 1.01) | 0.98 (0.95 - 1.01) | 0.98 (0.95 - 1.01) | 0.98 (0.95 - 1.01) |
| <b>Partner Education: Omitted=None</b>          |                    |                    |                    |                    |
| Cluster Mean Primary                            | 1.10 (1.03 - 1.17) | 1.10 (1.03 - 1.17) | 1.09 (1.03 - 1.16) | 1.09 (1.03 - 1.16) |
| Cluster Mean Secondary                          | 0.99 (0.92 - 1.06) | 0.99 (0.92 - 1.06) | 0.98 (0.92 - 1.05) | 0.98 (0.92 - 1.05) |
| Cluster Mean Higher Education                   | 0.91 (0.80 - 1.02) | 0.91 (0.80 - 1.02) | 0.91 (0.80 - 1.02) | 0.91 (0.80 - 1.02) |
| Cluster Mean Missing                            | 1.12 (1.00 - 1.25) | 1.12 (1.00 - 1.25) | 1.12 (1.00 - 1.25) | 1.11 (1.00 - 1.24) |
| <b>Marital Status: Omitted=Married</b>          |                    |                    |                    |                    |
| Cluster Mean Never Married                      | 1.11 (0.93 - 1.31) | 1.11 (0.93 - 1.31) | 1.11 (0.94 - 1.31) | 1.11 (0.94 - 1.32) |
| Cluster Mean Living Together                    | 1.11 (1.04 - 1.17) | 1.11 (1.04 - 1.17) | 1.10 (1.04 - 1.17) | 1.10 (1.04 - 1.17) |
| Cluster Mean Widowed                            | 1.80 (1.44 - 2.24) | 1.79 (1.44 - 2.23) | 1.79 (1.43 - 2.23) | 1.79 (1.43 - 2.23) |
| Cluster Mean Divorced                           | 1.90 (1.57 - 2.31) | 1.90 (1.57 - 2.31) | 1.90 (1.56 - 2.30) | 1.90 (1.56 - 2.30) |
| Cluster Mean Not Living Together                | 1.67 (1.47 - 1.90) | 1.67 (1.47 - 1.90) | 1.67 (1.47 - 1.90) | 1.67 (1.47 - 1.90) |
| <b>Religion: Omitted=Christian</b>              |                    |                    |                    |                    |
| Cluster Mean Religion Muslim                    | 1.01 (0.97 - 1.05) | 1.01 (0.97 - 1.05) | 1.01 (0.97 - 1.05) | 1.01 (0.97 - 1.05) |
| Cluster Mean Religion Jewish                    | 0.85 (0.64 - 1.15) | 0.86 (0.64 - 1.15) | 0.85 (0.64 - 1.15) | 0.85 (0.64 - 1.15) |
| Cluster Mean Religion Buddhist                  | 0.86 (0.73 - 1.01) | 0.86 (0.73 - 1.01) | 0.86 (0.73 - 1.00) | 0.86 (0.73 - 1.00) |
| Cluster Mean Religion Hindu                     | 1.40 (1.30 - 1.51) | 1.40 (1.30 - 1.51) | 1.40 (1.30 - 1.51) | 1.40 (1.30 - 1.51) |
| Cluster Mean Religion Sikh                      | 1.13 (0.86 - 1.50) | 1.14 (0.86 - 1.51) | 1.15 (0.87 - 1.52) | 1.15 (0.87 - 1.52) |
| Cluster Mean Religion Traditional               | 1.05 (0.95 - 1.16) | 1.04 (0.95 - 1.15) | 1.04 (0.95 - 1.15) | 1.04 (0.95 - 1.15) |
| Cluster Mean Religion Other                     | 1.07 (0.98 - 1.18) | 1.07 (0.98 - 1.17) | 1.08 (0.98 - 1.18) | 1.08 (0.98 - 1.18) |
| Cluster Mean Religion None                      | 0.87 (0.78 - 0.97) | 0.87 (0.78 - 0.96) | 0.86 (0.78 - 0.96) | 0.87 (0.78 - 0.96) |
| Cluster Mean Unknown/Missing                    | 1.07 (1.02 - 1.14) | 1.08 (1.02 - 1.14) | 1.07 (1.01 - 1.13) | 1.07 (1.01 - 1.13) |
| Cluster Mean Months Since Birth                 | 0.99 (0.99 - 0.99) | 0.99 (0.99 - 0.99) | 0.99 (0.99 - 0.99) | 0.99 (0.99 - 0.99) |
| <b>Had Ante-Natal Visit: Omitted=No Visit</b>   |                    |                    |                    |                    |
| Cluster Mean Had Ante-Natal Visit               | 0.86 (0.81 - 0.91) | 0.87 (0.82 - 0.93) | 0.85 (0.80 - 0.91) | 0.85 (0.80 - 0.91) |
| Cluster Mean Ante-Natal Visit Missing           | 1.32 (1.21 - 1.45) | 1.32 (1.21 - 1.45) | 1.29 (1.18 - 1.42) | 1.29 (1.18 - 1.42) |
| Corrected for Missing Data on Children who Died | No                 | Yes                | No                 | Yes                |
| Country Fixed Effects and Country Time Trends   | Yes                | Yes                | Yes                | Yes                |
| Number of clusters                              | 68,490             | 68,490             | 68,490             | 68,490             |

Note: Demographic and Health Survey data are available from [www.dhsprogram.com](http://www.dhsprogram.com). All variables are averages at the level of the DHS primary sampling unit cluster, based on 149 surveys in 62 countries, and 960,271 children born between 1985 and 2011. Coefficients illustrate the relative risk of moving from 0% vaccination coverage to 100% coverage (on the mortality of children born in the 5 years prior to interview). Columns 1 and 3 are based on the raw vaccination coverage in a cluster (defined as the proportion of children one year or older who have received the relevant doses), while columns 2 and 4 adjust the vaccination data for the selection effect due to non-reporting of vaccination status of children who have died.

## References

1. R. Langsten and K. Hill. The accuracy of mothers' reports of child vaccination: evidence from rural Egypt. *Soc. Sci. Med.*, 46(9):1205–1212, 1998.
2. C. J. Murray, B. Shengelia, N. Gupta, S. Moussavi, A. Tandon, and M. Thieren. Validity of reported vaccination coverage in 45 countries. *The Lancet*, 362(9389):1022–1027, 2003.
3. F. T. Cutts, H. S. Izurieta, and D. A. Rhoda. Measuring coverage in MNCH: Design, implementation, and interpretation challenges associated with tracking vaccination coverage using household surveys. *PLoS Medicine*, 10(5):e1001404, 2013.
4. World Health Organization. Measles vaccines: WHO position paper. *Wkly Epidemiol Rec*, 84(35):349–360, 2009.
5. World Health Organization. Polio vaccines and polio immunization in the pre-eradication era: WHO position paper. *Wkly Epidemiol Rec*, 85(23):213–28, 2010.
